# Supplementary material for: Mapping the Human miRNA Interactome by CLASH Reveals Frequent Noncanonical Binding
Source: PubMed Central journal article supplement (PMC3650559; doi:10.1016/j.cell.2013.03.043), 2013-04-25
Supplement: mmc4.pdf [file mmc4.pdf]

Table S1. Modifications to the Detailed CLASH Protocol, Related to Figure 1

| DATASET |      | Main modifications to the published detailed protocol                                                                                                                                                                                                                                                                                |
|---------|------|--------------------------------------------------------------------------------------------------------------------------------------------------------------------------------------------------------------------------------------------------------------------------------------------------------------------------------------|
| E1      | A12  | <ul style="list-style-type: none"> <li>Enzymatic reactions (PNK, TSAP, RNase treatments) performed at 37°C instead of 20°C</li> <li>3' linker ligation with T4 ligase 1 instead of T4 ligase 2 truncated K227Q</li> </ul>                                                                                                            |
| E2      | 0727 | <ul style="list-style-type: none"> <li>Inter-molecular ligation performed on IgG-Dynabeads instead of Ni-NTA agarose (hAgo1 not denatured), then hAgo1-RNA complexes eluted with guanidine hydrochloride and loaded on Ni-NTA agarose</li> <li>3' linker ligation with T4 ligase 1 instead of T4 ligase 2 truncated K227Q</li> </ul> |
| E3      | L1   | <ul style="list-style-type: none"> <li>3' linker ligation with T4 ligase 1 instead of T4 ligase 2 truncated K227Q</li> </ul>                                                                                                                                                                                                         |
| E4      | L2   | PUBLISHED DETAILED PROTOCOL                                                                                                                                                                                                                                                                                                          |
| E5      | TA1  | <ul style="list-style-type: none"> <li>hAgo1 cut out from IgG-Dynabeads with TEV protease instead of guanidine hydrochloride elution</li> <li>inter-molecular RNA-RNA ligation in solution (hAgo1 not denatured) for 1 hour instead of on Ni-NTA agarose (hAgo1 denatured) for 16 hours, then loading on Ni-NTA agarose</li> </ul>   |
| E6      | TAON | <ul style="list-style-type: none"> <li>hAgo1 cut out from IgG-Dynabeads with TEV protease instead of guanidine hydrochloride elution</li> <li>inter-molecular RNA-RNA ligation in solution for 16 hours (hAgo1 not denatured) instead of on Ni-NTA agarose (hAgo1 denatured), then loading on Ni-NTA agarose</li> </ul>              |
| E7      |      | <ul style="list-style-type: none"> <li>prepared according to E4 protocol</li> </ul>                                                                                                                                                                                                                                                  |
| E8      |      | <ul style="list-style-type: none"> <li>sample prepared in parallel with E7 on mixed human and yeast lysates according to E4 protocol</li> </ul>                                                                                                                                                                                      |
| E9      |      | <ul style="list-style-type: none"> <li>prepared according to E6 protocol</li> </ul>                                                                                                                                                                                                                                                  |
| E10     |      | <ul style="list-style-type: none"> <li>sample prepared in parallel with E9 on mixed human and yeast lysates according to E6 protocol</li> </ul>                                                                                                                                                                                      |

For each of the six CLASH experiments (E1-E6), the table lists the "internal identifier" used in the Supplemental Datasets, and the main differences in experimental protocol as compared to experiment E4. Experiments E7-E10 were used to assess experimental background by addition of yeast lysates to crosslinked HEK cell lysates.

Table S2. CLASH Read Statistics, Related to Figure 1

Table S2A

|                    | ALL DATASETS |      | DATASET E4   |      |
|--------------------|--------------|------|--------------|------|
|                    | Single reads | %    | Single reads | %    |
| <b>microRNA*</b>   | 21,832,771   | 20.6 | 1,722,779    | 7.6  |
| <b>mRNA</b>        | 20,134,598   | 19.0 | 3,767,064    | 16.5 |
| <b>tRNA</b>        | 40,910,266   | 38.5 | 11,596,776   | 50.9 |
| <b>rRNA</b>        | 13,491,752   | 12.7 | 3,709,881    | 16.3 |
| <b>snRNA</b>       | 1,546,938    | 1.5  | 300,695      | 1.3  |
| <b>pseudogenes</b> | 957,987      | 0.9  | 183,904      | 0.8  |
| <b>lincRNA</b>     | 519,538      | 0.5  | 138,261      | 0.6  |
| <b>snoRNA</b>      | 489,682      | 0.5  | 88,446       | 0.4  |
| <b>other</b>       | 6,288,134    | 5.9  | 1,272,717    | 5.6  |
| <b>Total:</b>      | 106,171,666  |      | 22,780,523   |      |

Table S2B

|                                         | All       | containing miRNAs | miRNA-mRNA (% of all) |
|-----------------------------------------|-----------|-------------------|-----------------------|
| <b>ALL DATASETS</b>                     |           |                   |                       |
| CHIMERIC READS:                         | 1,700,221 | 563,984           | 66,304 (3.9%)         |
| collapsed reads                         | 622,721   | 106,765           | 28,255 (4.5%)         |
| number of supported interactions        | 240,135   | 26,543            | 18,514 (7.7%)         |
| number of identified miRNAs             |           |                   | 399                   |
| number of identified mRNAs [ENSG/ENST]  |           |                   | 6,959 / 7,390         |
| <b>PUBLISHED DETAILED PROTOCOL (E4)</b> |           |                   |                       |
| CHIMERIC READS:                         | 794,729   | 303,154           | 29,943 (3.8%)         |
| collapsed reads                         | 290,221   | 58,337            | 17,237 (5.9%)         |
| number of supported interactions        | 110,148   | 16,386            | 12,198 (11.1%)        |
| number of identified miRNAs             |           |                   | 340                   |
| number of identified mRNAs [ENSG/ENST]  |           |                   | 5,427 / 5,705         |

Table S2C

| DATASET:                                             | E7        | E8             | E9        | E10            |
|------------------------------------------------------|-----------|----------------|-----------|----------------|
|                                                      | <b>HS</b> | <b>HS + SC</b> | <b>HS</b> | <b>HS + SC</b> |
| <b>protocol</b>                                      | <b>E4</b> |                | <b>E6</b> |                |
| number of mapped reads                               | 545,762   | 680,408        | 663,349   | 716,077        |
| <b>SINGLE READS</b>                                  |           |                |           |                |
| mapping unambiguously to human transcriptome         | 98.8%     | 97.93%         | 99.03%    | 99.08%         |
| mapping unambiguously to yeast genome                | 0.37%     | 1.45%          | 0.26%     | 0.5%           |
| mapping both to human transcriptome and yeast genome | 0.83%     | 0.62%          | 0.71%     | 0.41%          |
| <b>CHIMERIC READS</b>                                |           |                |           |                |
| number of miRNA hybrids                              | 1,700     | 1,581          | 79        | 75             |
| number of miRNA hybrids (collapsed reads)            | 900       | 938            | 74        | 69             |
| number of miRNA-yeast hybrids (collapsed reads)      | 1         | 16             | 0         | 7              |
| miRNA-yeast hybrids in all miRNA hybrids (collapsed) | 0.11%     | 1.7%           | 0%        | 10.1%          |

(A) Numbers of non-chimeric reads ("single reads") mapping to various RNA species. Sequencing reads were mapped to a custom human transcriptome database using BLAST, as described in detail in Experimental procedures. On average, 70% of all reads could be mapped to this database. \*The proportion of sequences mapping to miRNA depends on the size of fragments recovered from the agarose gel in the final stage of cDNA library preparation. In some experiments, including experiment E4, we specifically depleted samples in short cDNAs to increase sequencing depth of longer reads.

(B) Chimeric read statistics. Chimeric reads represent about 2% of all the cDNAs in the CLASH library and about 30% of them correspond to interactions between miRNAs and various RNA species (see also Figure 1D). Identification of chimeric reads and their analysis is described in detail in Experimental Procedures.

(C) Read statistics in the mixed human-yeast lysates experiment. Human and yeast lysates were mixed during CLASH to estimate the background originating from RNA-RNA interactions that can happen after cell lysis. High throughput sequencing reads were mapped to a custom database containing the human transcriptome and yeast genome. HS, experiment performed on human sample; HS + SC, experiment performed on mixed human and yeast sample.

Table S3. Experimentally Validated miRNA Targets Found in CLASH Data Set, Related to Figure 2

| miRNA                  | mRNA                     | number of chimeric reads supporting interaction | found in experiments: |
|------------------------|--------------------------|-------------------------------------------------|-----------------------|
| MIMAT0000062_let-7a    | ENSG00000034063_UHRF1    | 2                                               | E4                    |
|                        | ENSG00000055208_TAB2     | 16                                              | E3, E4                |
|                        | ENSG00000077809_GTF2I    | 1                                               | E5                    |
|                        | ENSG00000100697_DICER1   | 9                                               | E3, E4                |
|                        | ENSG00000102531_FNDC3A   | 1                                               | E3, E4                |
|                        | ENSG00000105810_CDK6     | 15                                              | E2                    |
|                        | ENSG00000115760_BIRC6    | 5                                               | E2, E4                |
|                        | ENSG00000137309_HMGA1    | 1                                               | E4                    |
|                        | ENSG00000149948_HMGA2    | 19                                              | E3, E4                |
|                        | ENSG00000153048_CARHSP1  | 2                                               | E4                    |
|                        | ENSG00000163214_DHX57    | 1                                               | E4                    |
| ENSG00000213516_RBMXL1 | 1                        | E4                                              |                       |
| MIMAT0000063_let-7b    | ENSG00000004864_SLC25A13 | 10                                              | E2                    |
|                        | ENSG00000055208_TAB2     | 4                                               | E4                    |
|                        | ENSG00000072501_SMC1A    | 3                                               | E4                    |
|                        | ENSG00000096696_DSP      | 4                                               | E5, E6                |
|                        | ENSG00000134824_FADS2    | 1                                               | E7                    |
|                        | ENSG00000136997_MYC      | 1                                               | E3                    |
|                        | ENSG00000137309_HMGA1    | 4                                               | E2                    |
|                        | ENSG00000162063_CCNF     | 2                                               | E4                    |
|                        | ENSG00000163214_DHX57    | 2                                               | E3                    |
|                        | ENSG00000164284_GRPEL2   | 1                                               | E4                    |
|                        | ENSG00000196497_IPO4     | 2                                               | E4                    |
| MIMAT0000064_let-7c    | ENSG00000100075_SLC25A1  | 1                                               | E2                    |
|                        | ENSG00000149948_HMGA2    | 9                                               | E2, E4                |
|                        | ENSG00000162063_CCNF     | 1                                               | E4                    |
| MIMAT0000065_let-7d    | ENSG00000163214_DHX57    | 2                                               | E3                    |
| MIMAT0000066_let-7e    | ENSG00000077809_GTF2I    | 1                                               | E6                    |
|                        | ENSG00000096696_DSP      | 2                                               | E4                    |
|                        | ENSG00000129128_SPCS3    | 2                                               | E4                    |
|                        | ENSG00000134874_DZIP1    | 3                                               | E4                    |
|                        | ENSG00000142186_SCYL1    | 1                                               | E4                    |
|                        | ENSG00000145996_CDKAL1   | 1                                               | E4                    |
|                        | ENSG00000163214_DHX57    | 2                                               | E3                    |
| MIMAT0000067_let-7f    | ENSG00000055208_TAB2     | 4                                               | E4                    |
|                        | ENSG00000149948_HMGA2    | 2                                               | E4                    |
|                        | ENSG00000159217_IGF2BP1  | 3                                               | E4                    |
| MIMAT0000415_let-7i    | ENSG00000164045_CDC25A   | 1                                               | E6                    |
| MIMAT0000068_miR-15a   | ENSG00000110092_CCND1    | 1                                               | E6                    |
|                        | ENSG00000118971_CCND2    | 17                                              | E2                    |
| MIMAT0000069_miR-16    | ENSG00000105173_CCNE1    | 2                                               | E3                    |
|                        | ENSG00000141101_NOB1     | 1                                               | E6                    |
| MIMAT0000070_miR-17    | ENSG00000118971_CCND2    | 1                                               | E3                    |
|                        | ENSG00000124201_ZNF1     | 4                                               | E3, E4                |
|                        | ENSG00000136997_MYC      | 1                                               | E6                    |
|                        | ENSG00000142192_APP      | 7                                               | E4                    |
| MIMAT0000071_miR-17*   | ENSG00000026025_VIM      | 76                                              | E3, E4, E6            |
| MIMAT0000075_miR-20a   | ENSG00000103479_RBL2     | 1                                               | E6                    |
|                        | ENSG00000140299_BNIP2    | 3                                               | E4                    |
| MIMAT0000082_miR-26a   | ENSG00000107864_CPEB3    | 2                                               | E5, E6                |
| MIMAT0000419_miR-27b   | ENSG00000148400_NOTCH1   | 2                                               | E4                    |
| MIMAT0000100_miR-29b   | ENSG00000106348_IMP1     | 1                                               | E5                    |
| MIMAT0000420_miR-30b   | ENSG00000145907_G3BP1    | 1                                               | E6                    |
| MIMAT0000244_miR-30c   | ENSG00000090905_TNRC6A   | 6                                               | E4                    |
|                        | ENSG00000153922_CHD1     | 1                                               | E4                    |
| MIMAT0000692_miR-30e   | ENSG00000064042_LIMCH1   | 1                                               | E4                    |
|                        | ENSG00000114353_GNAI2    | 1                                               | E5                    |
| MIMAT0000103_miR-106a  | ENSG00000166483_WEE1     | 3                                               | E4                    |
| MIMAT0000423_miR-125b  | ENSG00000108349_CASC3    | 4                                               | E4                    |
| MIMAT0000424_miR-128   | ENSG00000106799_TGFB1    | 1                                               | E6                    |
| MIMAT0000256_miR-181a  | ENSG00000111276_CDKN1B   | 1                                               | E6                    |
| MIMAT0000455_miR-185   | ENSG00000105810_CDK6     | 1                                               | E4                    |
| MIMAT0000456_miR-186   | ENSG00000131016_AKAP12   | 2                                               | E4                    |
| MIMAT0002819_miR-193b  | ENSG00000110092_CCND1    | 6                                               | E4                    |
|                        | ENSG00000037965_HOXC8    | 189                                             | E1, E3, E4, E6        |
| MIMAT0000226_miR-196a  | ENSG00000120068_HOXB8    | 62                                              | E2, E3, E4            |
|                        | ENSG00000122592_HOXA7    | 1                                               | E4                    |
|                        | ENSG00000037965_HOXC8    | 5                                               | E4                    |
| MIMAT0001080_miR-196b  | ENSG00000120068_HOXB8    | 19                                              | E2, E3, E4            |
|                        | ENSG00000134569_LRP4     | 2                                               | E4                    |
| MIMAT0000227_miR-197   | ENSG00000140391_TSPAN3   | 1                                               | E4                    |
|                        | ENSG00000148516_ZEB1     | 2                                               | E4                    |

|                       |                         |   |    |
|-----------------------|-------------------------|---|----|
| MIMAT0000267_miR-210  | ENSG00000136003_ISCU    | 2 | E3 |
| MIMAT0000279_miR-222  | ENSG00000141510_TP53    | 1 | E4 |
|                       | ENSG00000221914_PPP2R2A | 2 | E6 |
| MIMAT0000756_miR-326  | ENSG00000067225_PKM2    | 1 | E4 |
| MIMAT0005797_miR-1301 | ENSG00000026025_VIM     | 1 | E4 |

A list of experimentally validated targets was compiled from TarBase (Vergoulis et al., 2012) and miRTarBase (Hsu et al., 2011). The overlap between those databases and the CLASH dataset was calculated as described in Experimental Procedures. About 40% of validated interactions are supported by a single chimeric read.

Table S4. Overlap between Targets Identified in CLASH, CLASH Single Read Clusters, PAR-CLIP Clusters, and miRNA Targets Predicted by Common Algorithms, Related to Figure 2

Table S4A

|                                                                        |                               | PAR-CLIP clusters | CLASH single read clusters |
|------------------------------------------------------------------------|-------------------------------|-------------------|----------------------------|
|                                                                        | <b>Number of interactions</b> | 15,823            | 28,515                     |
| <b>CLASH chimeras</b>                                                  | 18,514                        | 1,596 (9%)        | 3,066 (17%)                |
| random localization within the same gene                               | 18,514                        | 1,125             | 2,036                      |
| random localization within a random gene with similar expression level | 18,514                        | 540               | 968                        |
| random localization within a random gene                               | 18,514                        | 268               | 439                        |
| <b>CLASH single read clusters</b>                                      | 28,515                        | 2,528 (9%)        |                            |
| random localization within the same gene                               | 28,515                        | 1,417             |                            |
| random localization within a random gene with similar expression level | 28,515                        | 702               |                            |
| random localization within a random gene                               | 28,515                        | 343               |                            |

Table S4B

|                        |                               | matches with CLASH | matches with control | enrichment |
|------------------------|-------------------------------|--------------------|----------------------|------------|
|                        | <b>Number of interactions</b> | 6,248              | 6,248                |            |
| <b>miRanda</b>         | 687,208                       | 411                | 29                   | 14.2 ×     |
| <b>PicTar</b>          | 205,263                       | 224                | 9                    | 24.9 ×     |
| <b>PITA</b>            | 192,255                       | 195                | 2                    | 97.5 ×     |
| <b>RNAhybrid</b>       | 992,584                       | 310                | 25                   | 12.4 ×     |
| <b>TargetScan</b>      | 54,199                        | 170                | 5                    | 34.0 ×     |
| <b>all predictions</b> | 2,131,509                     | 802                | 59                   | 13.6 ×     |

(A) The overlap between targets identified in CLASH, CLASH single read clusters, PAR-CLIP clusters.

(B) The overlap between CLASH targets, randomized dataset and predictions was calculated using BEDTools (Quinlan and Hall, 2010) as described in Supplemental Experimental Procedures. Enrichment was calculated as fold difference of observed overlap over the overlap expected by chance. For the five prediction methods, CLASH target enrichment ranged from 12- to 97-fold, and the enrichment with all predictions combined was 13.6-fold.

Table S5. Motifs Enriched in CLASH Targets of Individual miRNAs, Related to Figure 4

| miRNA                    | motif start position | motif end position | motif sequence |
|--------------------------|----------------------|--------------------|----------------|
| MIMAT0000089_miR-31      | 1                    | 7                  | CTTGCCT        |
| MIMAT0000275_miR-218     | 1                    | 7                  | AGCACAA        |
| MIMAT0000692_miR-30e     | 1                    | 7                  | GTTTACA        |
| MIMAT0000732_miR-378     | 1                    | 7                  | GTCCAGT        |
| MIMAT0004550_miR-30c-2*  | 1                    | 7                  | CTCCCAG        |
| MIMAT0000062_let-7a      | 2                    | 8                  | CTACCTC        |
| MIMAT0000063_let-7b      | 2                    | 8                  | CTACCTC        |
| MIMAT0000064_let-7c      | 2                    | 8                  | CTACCTC        |
| MIMAT0000065_let-7d      | 2                    | 8                  | CTACCTC        |
| MIMAT0000066_let-7e      | 2                    | 8                  | CTACCTC        |
| MIMAT0000067_let-7f      | 2                    | 8                  | CTACCTC        |
| MIMAT0000068_miR-15a     | 2                    | 8                  | TGCTGCT        |
| MIMAT0000071_miR-17*     | 2                    | 8                  | ACTGCAG        |
| MIMAT0000074_miR-19b     | 2                    | 8                  | TTTGAC         |
| MIMAT0000086_miR-29a     | 2                    | 8                  | TGGTGCT        |
| MIMAT0000226_miR-196a    | 2                    | 8                  | ACTACCT        |
| MIMAT0000255_miR-34a     | 2                    | 8                  | CACTGCC        |
| MIMAT0000259_miR-182     | 2                    | 8                  | TTGCCAA        |
| MIMAT0000423_miR-125b    | 2                    | 8                  | CTCAGGG        |
| MIMAT0000443_miR-125a-5p | 2                    | 8                  | CTCAGGG        |
| MIMAT0000455_miR-185     | 2                    | 8                  | TCTCTCC        |
| MIMAT0000681_miR-29c     | 2                    | 8                  | TGGTGCT        |
| MIMAT0000759_miR-148b    | 2                    | 8                  | TGCACTG        |
| MIMAT0001341_miR-424     | 2                    | 8                  | TGCTGCT        |
| MIMAT0002174_miR-484     | 2                    | 8                  | GAGCCTG        |
| MIMAT0003880_miR-671-5p  | 2                    | 8                  | GGCTTCC        |
| MIMAT0003885_miR-454     | 2                    | 8                  | TTGCACT        |
| MIMAT0004672_miR-106b*   | 2                    | 8                  | CAGTGCG        |
| MIMAT0004983_miR-940     | 2                    | 8                  | CCTGCCCT       |
| MIMAT0005577_miR-1226    | 2                    | 8                  | GCTGGTG        |
| MIMAT0005797_miR-1301    | 2                    | 8                  | AGTGCA         |
| MIMAT0005825_miR-1180    | 2                    | 8                  | GCCGGAA        |
| MIMAT0000069_miR-16      | 3                    | 9                  | GTGCTGC        |
| MIMAT0000072_miR-18a     | 3                    | 9                  | TGCACCT        |
| MIMAT0000080_miR-24      | 3                    | 9                  | ACTGAGC        |
| MIMAT0000084_miR-27a     | 3                    | 9                  | CACTGTG        |
| MIMAT0000085_miR-28-5p   | 3                    | 9                  | GAGCTCC        |
| MIMAT0000253_miR-10a     | 3                    | 9                  | TACAGGG        |
| MIMAT0000254_miR-10b     | 3                    | 9                  | TACAGGG        |
| MIMAT0000417_miR-15b     | 3                    | 9                  | GTGCTGC        |
| MIMAT0000419_miR-27b     | 3                    | 9                  | CACTGTG        |
| MIMAT0000760_miR-331-3p  | 3                    | 9                  | CCCAGGG        |
| MIMAT0000761_miR-324-5p  | 3                    | 9                  | GGGGATG        |
| MIMAT0002874_miR-503     | 3                    | 9                  | CCGCTGC        |
| MIMAT0003887_miR-769-3p  | 3                    | 9                  | AGATCCC        |
| MIMAT0004679_miR-296-3p  | 3                    | 9                  | CCAACCC        |
| MIMAT0004682_miR-361-3p  | 3                    | 9                  | CCTGGGG        |
| MIMAT0004748_miR-423-5p  | 3                    | 9                  | TGCCCT         |
| MIMAT0004945_miR-744     | 3                    | 9                  | AGCCCCG        |
| MIMAT0005794_miR-1296    | 3                    | 9                  | GGGCCCT        |
| MIMAT0000077_miR-22      | 4                    | 10                 | CTGGCAG        |
| MIMAT0000095_miR-96      | 4                    | 10                 | TAGTGCC        |
| MIMAT0000261_miR-183     | 4                    | 10                 | CAGTGCC        |
| MIMAT0000450_miR-149     | 4                    | 10                 | CGGAGCC        |
| MIMAT0000510_miR-320a    | 4                    | 10                 | CCCAGCT        |
| MIMAT0000710_miR-365     | 4                    | 10                 | AGGGGCA        |
| MIMAT0000750_miR-340*    | 4                    | 10                 | CTGAGAC        |
| MIMAT0000753_miR-342-3p  | 4                    | 10                 | CTGTGTG        |
| MIMAT0000756_miR-326     | 4                    | 10                 | GGCCCCG        |
| MIMAT0002819_miR-193b    | 4                    | 10                 | AGGGCCA        |
| MIMAT0004509_miR-93*     | 4                    | 10                 | GCTCAGC        |
| MIMAT0004693_miR-330-5p  | 4                    | 10                 | GGCCCCG        |

|                         |    |    |         |
|-------------------------|----|----|---------|
| MIMAT0005584_miR-1229   | 4  | 10 | GTGGTGA |
| MIMAT0005792_miR-320b   | 4  | 10 | CCCAGCT |
| MIMAT0000762_miR-324-3p | 5  | 11 | CCTGGGG |
| MIMAT0003339_miR-421    | 5  | 11 | TGTCTGT |
| MIMAT0004776_miR-505*   | 5  | 11 | TCCTGGC |
| MIMAT0004784_miR-455-3p | 5  | 11 | CCATGGA |
| MIMAT0000680_miR-106b   | 6  | 12 | GTCAGCA |
| MIMAT0003283_miR-615-3p | 6  | 12 | CCCAGGC |
| MIMAT0004504_miR-31*    | 6  | 12 | GTGGCA  |
| MIMAT0004680_miR-130b*  | 6  | 12 | CAGGGAA |
| MIMAT0004697_miR-151-5p | 6  | 12 | TGAGCTC |
| MIMAT0000087_miR-30a    | 7  | 13 | GAGGATG |
| MIMAT0000245_miR-30d    | 7  | 13 | GGGGATG |
| MIMAT0003886_miR-769-5p | 7  | 13 | CCAGAG  |
| MIMAT0000731_miR-378*   | 8  | 14 | CCTGGAG |
| MIMAT0004978_miR-935    | 8  | 14 | GAAGCGG |
| MIMAT0000078_miR-23a    | 9  | 15 | CCCTGGC |
| MIMAT0000279_miR-222    | 9  | 15 | TAGCCAG |
| MIMAT0000418_miR-23b    | 9  | 15 | CCCTGGC |
| MIMAT0005891_miR-1303   | 9  | 15 | GACCCCG |
| MIMAT0000082_miR-26a    | 10 | 16 | TCCTGGA |
| MIMAT0000757_miR-151-3p | 10 | 16 | AGGAGCT |
| MIMAT0000764_miR-339-5p | 10 | 16 | TCCTGGA |
| MIMAT0002876_miR-505    | 10 | 16 | CCAGCAA |
| MIMAT0003888_miR-766    | 10 | 16 | GCTGTGG |
| MIMAT0000104_miR-107    | 11 | 17 | CCCTGTA |
| MIMAT0000256_miR-181a   | 11 | 17 | CGACAGC |
| MIMAT0001340_miR-423-3p | 11 | 17 | GGGCCTC |
| MIMAT0002891_miR-18a*   | 11 | 17 | GGAGCAC |
| MIMAT0003218_miR-92b    | 11 | 17 | CCGGGAC |
| MIMAT0000103_miR-106a   | 12 | 18 | TGCACTG |
| MIMAT0000227_miR-197    | 12 | 18 | GGTGGAG |
| MIMAT0000278_miR-221    | 12 | 18 | CCAGCAG |
| MIMAT0000703_miR-361-5p | 12 | 18 | CCCTGGA |
| MIMAT0004950_miR-877*   | 12 | 18 | GGAGGAG |
| MIMAT0015041_miR-1260b  | 12 | 18 | TGGTGGC |
| MIMAT0000081_miR-25     | 13 | 19 | GACCGAG |
| MIMAT0000092_miR-92a    | 13 | 19 | GGCCGGG |
| MIMAT0000244_miR-30c    | 13 | 19 | AGAGTGT |
| MIMAT0000093_miR-93     | 14 | 20 | CCTGCAC |
| MIMAT0003266_miR-598    | 14 | 20 | ACGATGA |
| MIMAT0000070_miR-17     | 15 | 21 | ACCTGCA |
| MIMAT0000088_miR-30a*   | 15 | 21 | CTGCAAA |
| MIMAT0000075_miR-20a    | 16 | 22 | TACCTGC |
| MIMAT0000098_miR-100    | 16 | 22 | CACAAGT |
| MIMAT0000440_miR-191    | 16 | 22 | AGCTGCT |

For the discovery pipeline, see Figure 4 and Supplemental Experimental Procedures.



Table S6. List of Oligonucleotides, Related to Experimental Procedures

| PRIMER:                                               | SEQUENCE:                                                          | NOTES:                               |
|-------------------------------------------------------|--------------------------------------------------------------------|--------------------------------------|
| <b>Primers for Ago1 cloning</b>                       |                                                                    |                                      |
| Ago1_F                                                | TACAAAGCTTGGAGGTATGGAAGCGGGACCTCGG                                 |                                      |
| Ago1_R                                                | GCTGAATTCGCCTTCAAGCGAAGTACATGG                                     |                                      |
| <b>CLASH linkers and primers</b>                      |                                                                    |                                      |
| <b>3' linker</b>                                      |                                                                    |                                      |
| miRCat-33 linker (IDT)                                | AppTGGAAATTCTCGGGTGCCAAG/ddC/                                      |                                      |
| <b>5' linkers (barcode marked red)</b>                |                                                                    |                                      |
| E1: L5 Solexa                                         | invddT-GTTCArGrArGrUrUrCrUrArCrArGrUrCrCrGrArCrGrArUrC-OH          | used in experiment E1                |
| E2: L5a                                               | invddT-ACACrGrArCrGrCrUrUrCrUrCrGrArUrCrUrArC-OH                   | used in experiment E2                |
| E3: L5c                                               | invddT-ACACrGrArCrGrCrUrUrCrUrCrGrArUrCrUrGrA-OH                   | used in experiment E3                |
| E4: L5e                                               | invddT-ACACrGrArCrGrCrUrUrCrUrCrGrArUrCrUrCrArCrArGrC-OH           | used in experiment E4                |
| E5: L5Aa                                              | invddT-ACACrGrArCrGrCrUrUrCrUrCrGrArUrCrUrNnNnNrUrArGrC-OH         | used in experiment E5                |
| E6, E10: L5Ab                                         | invddT-ACACrGrArCrGrCrUrUrCrUrCrGrArUrCrUrNnNnNrUrUrArGrC-OH       | used in experiments E6 and E10       |
| E7: L5Cc                                              | invddT-ACACrGrArCrGrCrUrUrCrUrCrGrArUrCrUrNnNnNrArCrTrCrArGrC-OH   | used in experiment E7                |
| E8: L5Cd                                              | invddT-ACACrGrArCrGrCrUrUrCrUrCrGrArUrCrUrNnNnNrGrArCrTrTrArGrC-OH | used in experiment E8                |
| E9: L5Ac                                              | invddT-ACACrGrArCrGrCrUrUrCrUrCrGrArUrCrUrNnNnNrGrCrGrArGrC-OH     | used in experiment E9                |
| <b>PCR primers</b>                                    |                                                                    |                                      |
| miRCat-33 primer (IDT)                                | CCTTGGCACCCGAGAATT                                                 | primer for RT                        |
| PE_miRCat_PCR                                         | CAAGCAGAAGACGGCATAACGAGATCGGTCTCGGCATTCTGGCCTTGGCACCCGA GAATTC     | library amplification                |
| P5                                                    | AATGATACGGCGACCACCGAGATCTACACTCTTCCCTACACGACGCTCTCCGAT CT          | library amplification                |
| <b>Oligonucleotides for creating reporter vectors</b> |                                                                    |                                      |
| miR-92a-1xS+M_F                                       | TACTCTCGAGACAGGCCGGTTCTGTGCAATATATGCGGCCGCATAT                     | oligo with miR-92a full binding site |
| miR-92a-1xS+M_R                                       | ATATGCGGCCGCATATATTGCACAGAACC CGCCTGTCTCGAGAGTA                    | oligo with miR-92a full binding site |
| miR-92a-1xseed_F                                      | ATATCTCGAGTAACTAATTGTGTGCAATATATGCGGCCGCATTA                       | oligo with miR-92a seed              |
| miR-92a-1xseed_R                                      | TAATGCGGCCGCATATATTGCACACAATTAGTTTACTCGAGATAT                      | oligo with miR-92a seed              |
| miR-92a-1xmotif_F                                     | GCAACTCGAGGGGCCGGTTCATACCTTCTAGCGGCCGCCCT                          | oligo with miR-92a motif             |
| miR-92a-1xmotif_R                                     | AGGGCGGCCGCTAGAACGTATGAACCGGCCGCCCTCGAGTTGC                        | oligo with miR-92a motif             |
| PCGF5_XhoI_For                                        | GCTACTCGAGCAACAATAGCCTTCTCTCTG                                     | 3'UTR PCR; ENST00000336126           |
| PCGF5_NotI_Rev                                        | ATTAGCGGCCGCTTGTCAAAGTTGGCTGTATG                                   | 3'UTR PCR; ENST00000336126           |
| OSBPL8_XhoI_For                                       | ACGACTCGAGCTACCATTGAATCAGTGAACCTAG                                 | 3'UTR PCR; ENST00000261183           |
| OSBPL8_NotI_Rev                                       | ATTAGCGGCCGCTTGGCCTATGTTATGAACC                                    | 3'UTR PCR; ENST00000261183           |
| RFFL_XhoI_For                                         | CTTCTCGAGCTTTGAATCCTCCCTTCTG                                       | 3'UTR PCR; ENST00000315249           |
| RFFL_NotI_Rev                                         | ATTAGCGGCCGCGGGTTCACACCAATCTCC                                     | 3'UTR PCR; ENST00000315249           |
| MAPRE1_XhoI_For                                       | CTTACTCGAGGCCCTGAGATGTTACAGTTG                                     | 3'UTR PCR; ENST00000375571           |
| MAPRE1_NotI_Rev                                       | ATTAGCGGCCGCCACAGAGCATGCACTACAC                                    | 3'UTR PCR; ENST00000375571           |
| OSBPL2_XhoI_For                                       | CGTACTCGAGCTGAGTTCCGGGAGATAG                                       | 3'UTR PCR; ENST00000358053           |
| OSBPL2_NotI_Rev                                       | ATTAGCGGCCGCCACACCACTGTAAAGTATTC                                   | 3'UTR PCR; ENST00000358053           |
| OSBPL8_PCR_mut_F                                      | GCGCACTAGTATCCAGTGTTCAGTTGGTTGG                                    | Primer for mutagenesis               |
| OSBPL8_PCR_mut_R                                      | CGCGACTAGTTAAATCAGATCTTCTAGTTCACCTG                                | Primer for mutagenesis               |
| <b>Primers for qRT-PCR</b>                            |                                                                    |                                      |
| <b>miR-92a CLASH targets – motif</b>                  |                                                                    |                                      |
| SCLY_FW                                               | GCTGCGGGAAACACAAC                                                  | target: ENST00000254663, probe: 55   |
| SCLY_REV                                              | GGGGAGTCGTTGCATTATAGTC                                             | target: ENST00000254663, probe: 55   |
| RPL3_6_Fw                                             | CAAGTCATCCGTGTCATTGC                                               | target: ENST00000216146, probe: 6    |
| RPL3_6_REV                                            | ACAGTGCCTCCGTTACCT                                                 | target: ENST00000216146, probe: 6    |
| RPS5_53_FW                                            | CTCAGGCTGTGTTCTCAGGAT                                              | target: ENST00000196551, probe: 53   |
| RPS5_53_REV                                           | TCCACTTCCCAAAGAGCTTG                                               | target: ENST00000196551, probe: 53   |
| KAT2A_25_FW                                           | TCCTCACTCACTTCCCCAAA                                               | target: ENST00000225916, probe: 25   |
| KAT2A_25_REV                                          | TTGGAGAGTTTGCCCATAG                                                | target: ENST00000225916, probe: 25   |
| MAPRE1_62_FW                                          | GACGAGGCAGCTGAGTTGA                                                | target: ENST00000337339, probe: 62   |
| MAPRE1_62_REV                                         | TTCCGAAGTAGAAATCCCTCTCT                                            | target: ENST00000337339, probe: 62   |
| C9orf7_FW                                             | GGGTGCTGTACGGACTCTCT                                               | target: ENST00000316948, probe: 34   |
| C9orf7_REV                                            | CGCGAGCTTCTCCTCATC                                                 | target: ENST00000316948, probe: 34   |
| C1orf114_FW                                           | AACAGAAGGCCGGGAAAG                                                 | target: ENST00000367805, probe: 53   |
| C1orf114_REV                                          | TGTCTAGTTCTCTCTGACAGCTTG                                           | target: ENST00000367805, probe: 53   |
| MSL3_79_FW                                            | GTGCCACAAGCACTAACAGG                                               | target: ENST00000337339, probe: 79   |
| MSL3_79_REV                                           | GATTCAACAAGGCCGACTG                                                | target: ENST00000337339, probe: 79   |
| CCT7_83_FW                                            | CAGGAGGGCCATCAAGAAT                                                | target: ENST00000258091, probe: 83   |
| CCT7_83_REV                                           | GCAGGTACTTGGAGAGTTCCAT                                             | target: ENST00000258091, probe: 83   |
| CAPRIN1_68_FW                                         | GGCAGAAACACAGTTCCCA                                                | target: ENST00000341394, probe: 68   |
| CAPRIN1_68_REV                                        | AGGTTGCTGCTGGAGTGAAT                                               | target: ENST00000341394, probe: 68   |

|             |                     |                                   |
|-------------|---------------------|-----------------------------------|
| TRAP1_9_FW  | AGACCAATGCCGAGAAAGG | target: ENST00000246957, probe: 9 |
| TRAP1_9_REV | TCCTGTGCATCCCATACC  | target: ENST00000246957, probe: 9 |

**miR-92a CLASH targets – seed**

|               |                          |                                    |
|---------------|--------------------------|------------------------------------|
| CUX1_36_FW    | GACTCTGCCAGGTGGATGTT     | target: ENST00000292535, probe: 36 |
| CUX1_36_REV   | GTTGCGCAATACCGTTGC       | target: ENST00000292535, probe: 36 |
| TANC2_84_FW   | CGAGAGCAAGGGCAAAC        | target: ENST00000424789, probe: 84 |
| TANC2_84_REV  | GCCTCGTTCAGGTCCTCTAA     | target: ENST00000424789, probe: 84 |
| FNIP1_89_FW   | CGTCAGTGTCTGATGTCAGATTT  | target: ENST00000307968, probe: 89 |
| FNIP1_89_REV  | AGCTTCTGCTATTGGTTCATCC   | target: ENST00000307968, probe: 89 |
| EHBP1_FW      | CGACAGCGGGATTAGAGC       | target: ENST00000354487, probe: 9  |
| EHBP1_REV     | GATGAGTGGGAAGGGGTTT      | target: ENST00000354487, probe: 9  |
| RASAL2_21_FW  | TGCCTTAGTGACATTCTTCA     | target: ENST00000462775, probe: 21 |
| RASAL2_21_REV | CCACCTCAGACATACCAAG      | target: ENST00000462775, probe: 21 |
| RBM10_68_FW   | GGCAAAGCATGACTATGACGA    | target: ENST00000377604, probe: 68 |
| RBM10_68_REV  | GGGAGGCCTCGTAGGAAT       | target: ENST00000377604, probe: 68 |
| PCMTD1_FW     | AAGTACAATGGTGGGCTTAATTTT | target: ENST00000360540, probe: 31 |
| PCMTD1_REV    | AGCTCTCCAGTTTTCCCTTGG    | target: ENST00000360540, probe: 31 |
| RORA_2_FW     | TACATGTGAAGGCTGCAAGG     | target: ENST00000335670, probe: 2  |
| RORA_2_REV    | GTTCTTCTGACGAGGACAGGA    | target: ENST00000335670, probe: 2  |
| SRPR_5_FW     | GATGGGGACGTTACGAC        | target: ENST00000332118, probe: 5  |
| SRPR_5_REV    | CCGGAGCATGTCTACACGA      | target: ENST00000332118, probe: 5  |

**miR-92a negative controls**

|           |                           |                                    |
|-----------|---------------------------|------------------------------------|
| UBXN8_FW  | GGTTGTTGGCATTCTTCTCC      | target: ENST00000265616, probe: 56 |
| UBXN8_REV | GCAAAGAAAATCCTTGATTCC     | target: ENST00000265616, probe: 56 |
| TPRKB_FW  | GCAAACAAGCAGTTCACCTC      | target: ENST00000272424, probe: 48 |
| TPRKB_REV | AAGTGTCAATTTGCTGAGATACCAA | target: ENST00000272424, probe: 48 |
| SIP1_FW   | GGTGAAGTTATGTGCTGACG      | target: ENST00000250379, probe: 5  |
| SIP1_REV  | CCAATTAATCAGATATCCAAGAC   | target: ENST00000250379, probe: 5  |
| ADK_FW    | TTCAATTAAGTGGCTCAGTGG     | target: ENST00000286621, probe: 5  |
| ADK_REV   | TCTATCCAATGCATCCAAA       | target: ENST00000286621, probe: 5  |
| ADAL_FW   | TGAAGTTAGCATTGCATCTTTCAG  | target: ENST00000305605, probe: 38 |
| ADAL_REV  | ATGTTCCATGCCCGATTCT       | target: ENST00000305605, probe: 38 |

**Other miR-92a target**

|                   |                         |                                   |
|-------------------|-------------------------|-----------------------------------|
| 12652-2_lincRNA_F | GCAAAAATCCCTCATGCAGT    | target: ENST00000500949, probe: 4 |
| 12652-2_lincRNA_R | TCAAACATCCAAGTATCCACCTT | target: ENST00000500949, probe: 4 |

**miRNA inhibitors synthesized by IDT**

|                        |                                                        |                   |
|------------------------|--------------------------------------------------------|-------------------|
| NC5 AMO                | mC/ZEN/mGmCmGmAmCmUmAmUmAmCmGmCmGmCmAmUmAmUmGmG/ZEN/mU | Negative control  |
| Hsa-miR-92a-3p ZEN AMO | mA/ZEN/mCmAmGmGmCmCmGmGmAmCmAmAmGmUmGmCmA mAmU/ZEN/mA  | miR-92a inhibitor |
